# Supplementary material
Source: publisher figshare collection journal article supplement (https://rs.figshare.com/ndownloader/files/12995774)
Supplement: Supplementary file 1 [file 12995774]

## Sheet: ESMData1_Exp2_NutSharing_Data
Pair	Dominance	Session	Condition	Trial	Session_Trial	Rock_Transfer	Rock_Theft	Rock_All	Nut_Transfer	Nut_Theft	Nut_All	Gesture_by_Rock_Owner
BiliMalaika	Donor	Control1	Control	1	1	0	0	0	0	0	0	0
BiliMalaika	Donor	Control1	Control	2	2	0	0	0	0	0	0	1
BiliMalaika	Donor	Control1	Control	3	3	0	0	0	0	0	0	0
BiliMalaika	Donor	Control1	Control	4	4	0	0	0	0	0	0	0
BiliMalaika	Donor	Control1	Control	5	5	0	0	0	0	0	0	0
BiliMalaika	Donor	Control2	Control	6	1	0	0	0	0	0	0	0
BiliMalaika	Donor	Control2	Control	7	2	0	0	0	0	0	0	1
BiliMalaika	Donor	Control2	Control	8	3	0	0	0	0	0	0	0
BiliMalaika	Donor	Control2	Control	9	4	0	0	0	0	0	0	0
BiliMalaika	Donor	Control2	Control	10	5	0	0	0	0	0	0	0
BiliMalaika	Donor	Test1	Test	1	1	0	0	0	0	0	0	1
BiliMalaika	Donor	Test1	Test	2	2	0	0	0	0	0	0	0
BiliMalaika	Donor	Test1	Test	3	3	0	0	0	0	0	0	1
BiliMalaika	Donor	Test1	Test	4	4	0	0	0	0	0	0	0
BiliMalaika	Donor	Test1	Test	5	5	0	0	0	0	0	0	1
BiliMalaika	Donor	Test2	Test	6	1	0	0	0	0	0	0	0
BiliMalaika	Donor	Test2	Test	7	2	0	0	0	0	0	0	0
BiliMalaika	Donor	Test2	Test	8	3	0	0	0	0	0	0	0
BiliMalaika	Donor	Test2	Test	9	4	0	0	0	0	0	0	1
BiliMalaika	Donor	Test2	Test	10	5	0	0	0	0	0	0	0
ElekeSake	Recipient	Control1	Control	1	1	0	0	0	0	0	0	0
ElekeSake	Recipient	Control1	Control	2	2	0	0	0	0	0	0	0
ElekeSake	Recipient	Control1	Control	3	3	0	0	0	0	0	0	0
ElekeSake	Recipient	Control1	Control	4	4	0	0	0	0	0	0	0
ElekeSake	Recipient	Control1	Control	5	5	0	0	0	0	0	0	0
ElekeSake	Recipient	Control2	Control	6	1	0	0	0	0	0	0	0
ElekeSake	Recipient	Control2	Control	7	2	0	0	0	0	0	0	0
ElekeSake	Recipient	Control2	Control	8	3	0	0	0	0	0	0	0
ElekeSake	Recipient	Control2	Control	9	4	0	0	0	0	0	0	0
ElekeSake	Recipient	Control2	Control	10	5	0	0	0	0	0	0	0
ElekeSake	Recipient	Test1	Test	1	1	0	0	0	0	0	0	0
ElekeSake	Recipient	Test1	Test	2	2	0	0	0	0	0	0	1
ElekeSake	Recipient	Test1	Test	3	3	0	0	0	0	0	0	0
ElekeSake	Recipient	Test1	Test	4	4	0	0	0	0	0	0	1
ElekeSake	Recipient	Test1	Test	5	5	0	0	0	0	0	0	1
ElekeSake	Recipient	Test2	Test	6	1	0	0	0	0	1	1	0
ElekeSake	Recipient	Test2	Test	7	2	0	0	0	0	0	0	1
ElekeSake	Recipient	Test2	Test	8	3	0	0	0	0	0	0	1
ElekeSake	Recipient	Test2	Test	9	4	0	0	0	0	0	0	1
ElekeSake	Recipient	Test2	Test	10	5	0	0	0	0	0	0	1
KalinaBili	Donor	Control1	Control	1	1	0	0	0	0	0	0	0
KalinaBili	Donor	Control1	Control	2	2	0	0	0	0	0	0	1
KalinaBili	Donor	Control1	Control	3	3	0	0	0	0	0	0	1
KalinaBili	Donor	Control1	Control	4	4	0	0	0	0	0	0	1
KalinaBili	Donor	Control1	Control	5	5	0	0	0	0	1	1	1
KalinaBili	Donor	Control2	Control	6	1	0	0	0	0	0	0	0
KalinaBili	Donor	Control2	Control	7	2	0	0	0	0	0	0	0
KalinaBili	Donor	Control2	Control	8	3	0	0	0	0	0	0	0
KalinaBili	Donor	Control2	Control	9	4	0	0	0	0	0	0	0
KalinaBili	Donor	Control2	Control	10	5	0	0	0	0	0	0	1
KalinaBili	Donor	Test1	Test	1	1	0	0	0	0	1	1	0
KalinaBili	Donor	Test1	Test	2	2	0	0	0	0	0	0	1
KalinaBili	Donor	Test1	Test	3	3	0	0	0	0	0	0	1
KalinaBili	Donor	Test1	Test	4	4	0	0	0	0	0	0	0
KalinaBili	Donor	Test1	Test	5	5	0	0	0	0	0	0	1
KalinaBili	Donor	Test2	Test	6	1	0	0	0	1	0	1	0
KalinaBili	Donor	Test2	Test	7	2	0	0	0	1	0	1	1
KalinaBili	Donor	Test2	Test	8	3	0	0	0	0	0	0	1
KalinaBili	Donor	Test2	Test	9	4	0	0	0	0	0	0	0
KalinaBili	Donor	Test2	Test	10	5	0	0	0	0	0	0	1
KinshasaLikasi	Recipient	Control1	Control	1	1	0	0	0	0	0	0	0
KinshasaLikasi	Recipient	Control1	Control	2	2	0	0	0	0	0	0	0
KinshasaLikasi	Recipient	Control1	Control	3	3	0	0	0	0	0	0	0
KinshasaLikasi	Recipient	Control1	Control	4	4	0	0	0	0	0	0	0
KinshasaLikasi	Recipient	Control1	Control	5	5	0	0	0	0	0	0	0
KinshasaLikasi	Recipient	Control2	Control	6	1	0	0	0	1	0	1	0
KinshasaLikasi	Recipient	Control2	Control	7	2	0	0	0	0	0	0	0
KinshasaLikasi	Recipient	Control2	Control	8	3	0	0	0	0	0	0	0
KinshasaLikasi	Recipient	Control2	Control	9	4	0	0	0	0	0	0	0
KinshasaLikasi	Recipient	Control2	Control	10	5	0	0	0	0	0	0	0
KinshasaLikasi	Recipient	Test1	Test	1	1	0	0	0	0	0	0	1
KinshasaLikasi	Recipient	Test1	Test	2	2	0	0	0	0	0	0	1
KinshasaLikasi	Recipient	Test1	Test	3	3	0	0	0	0	0	0	1
KinshasaLikasi	Recipient	Test1	Test	4	4	0	0	0	0	0	0	1
KinshasaLikasi	Recipient	Test1	Test	5	5
KinshasaLikasi	Recipient	Test2	Test	6	1	0	0	0	0	0	0	0
KinshasaLikasi	Recipient	Test2	Test	7	2	0	0	0	0	0	0	0
KinshasaLikasi	Recipient	Test2	Test	8	3	0	0	0	0	0	0	0
KinshasaLikasi	Recipient	Test2	Test	9	4	0	0	0	0	0	0	0
KinshasaLikasi	Recipient	Test2	Test	10	5	0	0	0	0	0	0	0
KisantuEleke	Donor	Control1	Control	1	1	0	0	0	0	0	0	0
KisantuEleke	Donor	Control1	Control	2	2	0	0	0	0	0	0	0
KisantuEleke	Donor	Control1	Control	3	3	0	0	0	0	0	0	0
KisantuEleke	Donor	Control1	Control	4	4	0	0	0	0	0	0	0
KisantuEleke	Donor	Control1	Control	5	5	0	0	0	0	0	0	0
KisantuEleke	Donor	Control2	Control	6	1	0	0	0	0	0	0	0
KisantuEleke	Donor	Control2	Control	7	2	0	0	0	0	0	0	1
KisantuEleke	Donor	Control2	Control	8	3	0	0	0	0	0	0	0
KisantuEleke	Donor	Control2	Control	9	4	0	0	0	0	0	0	0
KisantuEleke	Donor	Control2	Control	10	5	0	0	0	0	0	0	0
KisantuEleke	Donor	Test1	Test	1	1	0	1	1	1	0	1	0
KisantuEleke	Donor	Test1	Test	2	2	0	0	0	0	1	1	1
KisantuEleke	Donor	Test1	Test	3	3	0	1	1	0	1	1	0
KisantuEleke	Donor	Test1	Test	4	4	0	1	1	0	0	0	1
KisantuEleke	Donor	Test1	Test	5	5	0	0	0	0	1	1	0
KisantuEleke	Donor	Test2	Test	6	1	0	0	0	0	1	1	0
KisantuEleke	Donor	Test2	Test	7	2	0	0	0	0	0	0	1
KisantuEleke	Donor	Test2	Test	8	3	0	0	0	0	1	1	1
KisantuEleke	Donor	Test2	Test	9	4	0	1	1	0	1	1	1
KisantuEleke	Donor	Test2	Test	10	5	0	0	0	0	0	0	1
LikasiIsiro	Donor	Control1	Control	1	1	0	0	0	0	0	0	0
LikasiIsiro	Donor	Control1	Control	2	2	0	0	0	0	0	0	0
LikasiIsiro	Donor	Control1	Control	3	3	0	0	0	0	0	0	0
LikasiIsiro	Donor	Control1	Control	4	4	0	0	0	0	0	0	0
LikasiIsiro	Donor	Control1	Control	5	5	0	0	0	0	0	0	0
LikasiIsiro	Donor	Control2	Control	6	1	0	0	0	0	0	0	0
LikasiIsiro	Donor	Control2	Control	7	2	0	0	0	0	0	0	0
LikasiIsiro	Donor	Control2	Control	8	3	0	0	0	0	0	0	0
LikasiIsiro	Donor	Control2	Control	9	4	0	0	0	0	0	0	0
LikasiIsiro	Donor	Control2	Control	10	5	0	0	0	0	0	0	0
LikasiIsiro	Donor	Test1	Test	1	1	0	0	0	0	0	0	0
LikasiIsiro	Donor	Test1	Test	2	2	0	0	0	0	0	0	0
LikasiIsiro	Donor	Test1	Test	3	3	0	0	0	0	0	0	1
LikasiIsiro	Donor	Test1	Test	4	4	0	0	0	0	0	0	0
LikasiIsiro	Donor	Test1	Test	5	5	0	0	0	0	0	0	0
LikasiIsiro	Donor	Test2	Test	6	1	0	0	0	0	0	0	0
LikasiIsiro	Donor	Test2	Test	7	2	0	0	0	0	0	0	0
LikasiIsiro	Donor	Test2	Test	8	3	0	0	0	0	0	0	0
LikasiIsiro	Donor	Test2	Test	9	4	0	0	0	0	0	0	0
LikasiIsiro	Donor	Test2	Test	10	5	0	0	0	0	0	0	0
MasisiKisantu	Recipient	Control1	Control	1	1	0	0	0	0	0	0	0
MasisiKisantu	Recipient	Control1	Control	2	2	0	0	0	0	0	0	0
MasisiKisantu	Recipient	Control1	Control	3	3	0	0	0	0	0	0	0
MasisiKisantu	Recipient	Control1	Control	4	4	0	0	0	0	0	0	0
MasisiKisantu	Recipient	Control1	Control	5	5	0	0	0	0	0	0	0
MasisiKisantu	Recipient	Control2	Control	6	1	0	0	0	0	0	0	0
MasisiKisantu	Recipient	Control2	Control	7	2	0	0	0	0	0	0	0
MasisiKisantu	Recipient	Control2	Control	8	3	0	0	0	0	0	0	0
MasisiKisantu	Recipient	Control2	Control	9	4	0	0	0	0	0	0	0
MasisiKisantu	Recipient	Control2	Control	10	5	0	0	0	0	0	0	0
MasisiKisantu	Recipient	Test1	Test	1	1	0	0	0	1	0	1	0
MasisiKisantu	Recipient	Test1	Test	2	2	0	0	0	0	0	0	0
MasisiKisantu	Recipient	Test1	Test	3	3	0	0	0	1	0	1	0
MasisiKisantu	Recipient	Test1	Test	4	4	0	0	0	0	0	0	1
MasisiKisantu	Recipient	Test1	Test	5	5	0	0	0	1	0	1	0
MasisiKisantu	Recipient	Test2	Test	6	1	0	0	0	1	0	1	0
MasisiKisantu	Recipient	Test2	Test	7	2	0	0	0	1	1	1	0
MasisiKisantu	Recipient	Test2	Test	8	3	0	0	0	1	0	1	0
MasisiKisantu	Recipient	Test2	Test	9	4	0	0	0	0	0	0	0
MasisiKisantu	Recipient	Test2	Test	10	5	0	0	0	1	0	1	0
MuandaKalina	Recipient	Control1	Control	1	1	0	0	0	0	0	0	0
MuandaKalina	Recipient	Control1	Control	2	2	0	0	0	0	0	0	0
MuandaKalina	Recipient	Control1	Control	3	3	0	0	0	0	0	0	0
MuandaKalina	Recipient	Control1	Control	4	4	0	0	0	0	0	0	1
MuandaKalina	Recipient	Control1	Control	5	5	0	0	0	0	0	0	0
MuandaKalina	Recipient	Control2	Control	6	1	0	0	0	0	0	0	0
MuandaKalina	Recipient	Control2	Control	7	2	0	0	0	0	0	0	0
MuandaKalina	Recipient	Control2	Control	8	3	0	0	0	0	0	0	0
MuandaKalina	Recipient	Control2	Control	9	4	0	0	0	0	0	0	0
MuandaKalina	Recipient	Control2	Control	10	5	0	0	0	0	0	0	0
MuandaKalina	Recipient	Test1	Test	1	1	0	0	0	0	1	1	0
MuandaKalina	Recipient	Test1	Test	2	2	0	0	0	0	0	0	0
MuandaKalina	Recipient	Test1	Test	3	3	0	0	0	0	0	0	0
MuandaKalina	Recipient	Test1	Test	4	4	0	0	0	0	0	0	1
MuandaKalina	Recipient	Test1	Test	5	5	0	0	0	0	0	0	0
MuandaKalina	Recipient	Test2	Test	6	1	0	0	0	0	1	1	1
MuandaKalina	Recipient	Test2	Test	7	2	0	0	0	0	0	0	1
MuandaKalina	Recipient	Test2	Test	8	3	0	1	1	0	1	1	0
MuandaKalina	Recipient	Test2	Test	9	4	0	0	0	1	0	1	1
MuandaKalina	Recipient	Test2	Test	10	5	0	1	1	0	1	1	0
SakeMuanda	Recipient	Control1	Control	1	1	0	0	0	0	0	0	0
SakeMuanda	Recipient	Control1	Control	2	2	0	0	0	0	0	0	0
SakeMuanda	Recipient	Control1	Control	3	3	0	0	0	0	0	0	0
SakeMuanda	Recipient	Control1	Control	4	4	0	0	0	0	0	0	0
SakeMuanda	Recipient	Control1	Control	5	5	0	0	0	0	0	0	0
SakeMuanda	Recipient	Control2	Control	6	1	0	0	0	0	0	0	0
SakeMuanda	Recipient	Control2	Control	7	2	0	0	0	0	0	0	0
SakeMuanda	Recipient	Control2	Control	8	3	0	0	0	0	0	0	0
SakeMuanda	Recipient	Control2	Control	9	4	0	0	0	0	0	0	0
SakeMuanda	Recipient	Control2	Control	10	5	0	0	0	0	0	0	0
SakeMuanda	Recipient	Test1	Test	1	1	0	1	1	0	1	1	0
SakeMuanda	Recipient	Test1	Test	2	2	0	0	0	0	1	1	0
SakeMuanda	Recipient	Test1	Test	3	3	0	0	0	0	0	0	0
SakeMuanda	Recipient	Test1	Test	4	4	0	0	0	0	0	0	0
SakeMuanda	Recipient	Test1	Test	5	5	0	0	0	0	0	0	1
SakeMuanda	Recipient	Test2	Test	6	1	0	0	0	1	0	1	1
SakeMuanda	Recipient	Test2	Test	7	2	0	0	0	0	1	1	1
SakeMuanda	Recipient	Test2	Test	8	3	0	0	0	0	0	0	0
SakeMuanda	Recipient	Test2	Test	9	4	0	0	0	0	0	0	0
SakeMuanda	Recipient	Test2	Test	10	5	0	0	0	0	0	0	0
WakaMasisi	Recipient	Control1	Control	1	1	0	0	0	0	0	0	1
WakaMasisi	Recipient	Control1	Control	2	2	1	0	1	0	0	0	0
WakaMasisi	Recipient	Control1	Control	3	3	0	0	0	0	0	0	1
WakaMasisi	Recipient	Control1	Control	4	4	0	0	0	0	0	0	1
WakaMasisi	Recipient	Control1	Control	5	5	0	0	0	0	0	0	0
WakaMasisi	Recipient	Control2	Control	6	1	0	0	0	0	0	0	0
WakaMasisi	Recipient	Control2	Control	7	2	0	0	0	0	0	0	1
WakaMasisi	Recipient	Control2	Control	8	3	0	0	0	0	0	0	1
WakaMasisi	Recipient	Control2	Control	9	4	0	0	0	0	0	0	0
WakaMasisi	Recipient	Control2	Control	10	5	0	0	0	0	0	0	1
WakaMasisi	Recipient	Test1	Test	1	1	0	0	0	0	0	0	0
WakaMasisi	Recipient	Test1	Test	2	2	0	0	0	1	1	1	1
WakaMasisi	Recipient	Test1	Test	3	3	0	0	0	1	1	1	0
WakaMasisi	Recipient	Test1	Test	4	4	1	0	1	1	1	1	1
WakaMasisi	Recipient	Test1	Test	5	5	0	0	0	1	0	1	0
WakaMasisi	Recipient	Test2	Test	6	1	1	0	1	0	0	0	0
WakaMasisi	Recipient	Test2	Test	7	2	0	0	0	0	0	0	0
WakaMasisi	Recipient	Test2	Test	8	3	0	0	0	0	0	0	0
WakaMasisi	Recipient	Test2	Test	9	4	0	0	0	1	1	1	0
WakaMasisi	Recipient	Test2	Test	10	5	0	0	0	1	1	1	0

## Sheet: ESMData2_Exp2_GeneralizedRecipr
Subject	Nut_Session	Current_Nut_Owner_Session	Condition	Date	Any_Nut_DirectTransfer	Previous_Rock_Owner_Session	Date	Received_Nuts_in_Previous_Session
Bili	1	Test 1	Test	2018-11-05	0	Test 1	2018-11-05	1
Bili	2	Control 1	Control	2018-11-11	0	Control 1	2018-11-09	1
Bili	3	Control 2	Control	2018-11-15	0	Control 2	2018-11-15	0
Bili	4	Test 2	Test	2018-11-16	0	Test 2	2018-11-16	1
Eleke	2	Test 1	Test	2018-11-08	0	Control 1	2018-11-07	0
Eleke	3	Test 2	Test	2018-11-12	0	Test 2 (Test 1 before that)	2018-11-12	1
Eleke	4	Control 2	Control	2018-11-13	0	Test 2	2018-11-12	1
Kalina	1	Test 1	Test	2018-11-05	0	Test 1	2018-11-05	1
Kalina	2	Control 1	Control	2018-11-09	0	Test 1	2018-11-05	1
Kalina	3	Control 2	Control	2018-11-15	0	Test 2 (Control 1 and 2 before)	2018-11-15	1
Kalina	4	Test 2	Test	2018-11-16	1	Test 2	2018-11-15	1
Kisantu	1	Control 1	Control	2018-11-07	0	Control 1 (Test 1 before)	2018-11-07	0
Kisantu	2	Test 1	Test	2018-11-10	1	Control 1	2018-11-07	0
Kisantu	3	Test 2	Test	2018-11-12	0	Control 2	2018-11-12	0
Kisantu	4	Control 2	Control	2018-11-14	0	Test 2	2018-11-14	1
Likasi	2	Test 1	Test	2018-11-15	0	Control 1	2018-11-14	0
Likasi	3	Test 2	Test	2018-11-16	0	Test 1	2018-11-15	0
Likasi	4	Control 2	Control	2018-11-17	0	Test 1	2018-11-15	0
Masisi	2	Control 1	Control	2018-11-07	0	Test 1	2018-11-07	1
Masisi	3	Control 2	Control	2018-11-12	0	Control 1	2018-11-10	0
Masisi	4	Test 2	Test	2018-11-14	1	Control 1	2018-11-10	0
Muanda	2	Control 1	Control	2018-11-11	0	Test 1 (Control 1 before)	2018-11-08	1
Muanda	3	Control 2	Control	2018-11-13	0	Test 2	2018-11-13	1
Muanda	4	Test 2	Test	2018-11-15	1	Test 2	2018-11-13	1
Sake	1	Control 1	Control	2018-11-07	0	Control 1	2018-11-06	0
Sake	2	Test 1	Test	2018-11-08	0	Test 1	2018-11-08	0
Sake	3	Test 2	Test	2018-11-13	1	Control 2 (Test 2 before)	2018-11-13	0
Sake	4	Control 2	Control	2018-11-16	0	Control 2	2018-11-13	0
